# Supplementary material for: Synthesis, Empirical and Theoretical Investigations on New Histaminium Bis(Trioxonitrate) Compound
Source: MDPI journal article supplement (doi:10.3390/molecules28041931), 2023-02-17
Supplement: s1 [file s1]

---

# Synthesis, Empirical and Theoretical Investigations on New Histaminium Bis(Trioxonitrate) Compound

Mahdi Jmai <sup>1</sup>, Sofian Gatfaoui <sup>1</sup>, Nouredine Issaoui <sup>2,\*</sup>, Thierry Roisnel <sup>3</sup>, Aleksandr S. Kazachenko <sup>4,5,\*</sup>, Omar Al-Dossary <sup>6</sup>, Houda Marouani <sup>1,\*</sup> and Anna S. Kazachenko <sup>4</sup>

<sup>1</sup> LR13ES08 Material Chemistry Laboratory, Faculty of Sciences of Bizerte, Université de Carthage, Bizerte7021, Tunisia

<sup>2</sup> Laboratory of Quantum and Statistical Physics, Faculty of Sciences, University of Monastir, Monastir 5079, Tunisia

<sup>3</sup> CNRS (Centre National de la Recherche Scientifique), ISCR (Institut des Sciences Chimiques de Rennes)–UMR 6226, University of Rennes, 35000 Rennes

<sup>4</sup> Department of organic and analytical chemistry, Institute of Non-Ferrous Metals and Materials, Siberian Federal University, Krasnoyarsk 660041

<sup>5</sup> Krasnoyarsk Scientific Center, Siberian Branch Institute of Chemistry and Chemical Technology, Russian Academy of Sciences

<sup>6</sup> Department of Physics and Astronomy, College of Science, King Saud University, BO Box 2455, Riyadh 11451, Saudi Arabia

\* Correspondence: issaoui\_nouredine@yahoo.fr (N.I.); leo\_lion\_leo@mail.ru (A.S.K.); houdamarouani2015@gmail.com (H.M.)

## Supplementary Materials

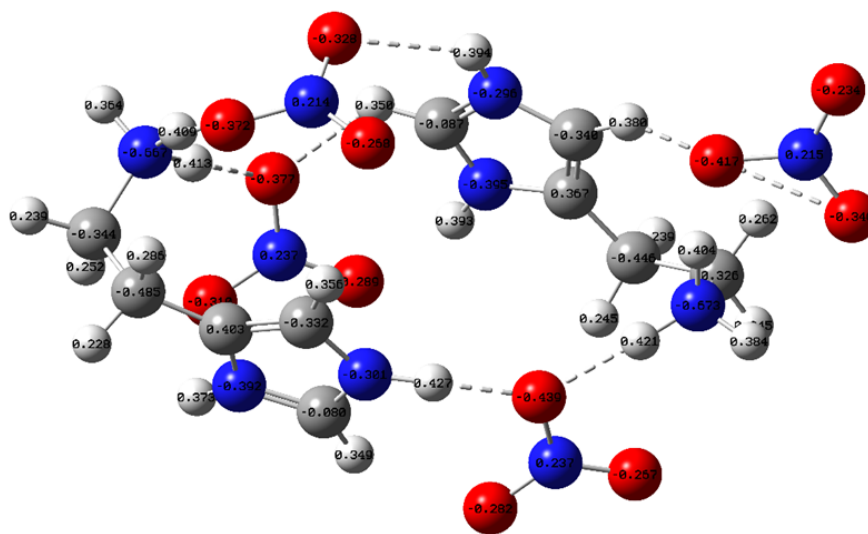

**Figure S1.** The representation of the Mulliken charges populations calculated for the HTN.

---

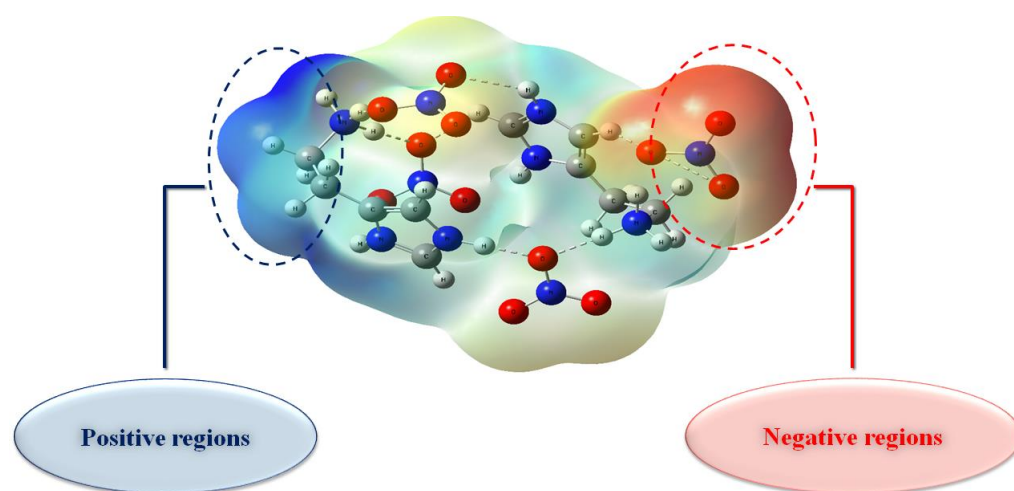

**Figure S2.** The total electron densities mapped with the potential electrostatic surface of the HTN.

**Table S1.** Assignment of experimental and theoretical wave numbers (cm<sup>-1</sup>) of different atomic groups of HTN

| Experimental<br>IR | Calculated<br>frequencies | Vibrational<br>assignments (% PED) | Experimental<br>IR | Calculated<br>frequencies | Vibrational<br>assignments (% PED) |
|--------------------|---------------------------|------------------------------------|--------------------|---------------------------|------------------------------------|
| 3436 m, L          | 3632                      | $\nu$ NH (99)                      | 970 m              | 976                       | $\nu$ ON (85)                      |
| 3436 m, L          | 3555                      | $\nu$ NH (99)                      | 970 m              | 973                       | $\nu$ ON (76)                      |
| 3436 m, L          | 3523                      | $\nu$ NH (99)                      | -                  | 968                       | $\delta$ HCCC (44)                 |
| 3436 m, L          | 3519                      | $\nu$ NH (99)                      | -                  | 950                       | $\nu$ ON (83)                      |
| -                  | 3387                      | $\nu$ CH (69)                      | -                  | 947                       | $\nu$ ON (70)                      |
| -                  | 3387                      | $\nu$ NH (29)                      | -                  | 1496                      | $\beta$ NCN (10)                   |
| -                  | 3346                      | $\nu$ CH (98)                      | -                  | 928                       | $\beta$ CNC (29)                   |
| -                  | 3293                      | $\nu$ CH (99)                      | -                  | 928                       | HCCC (12)                          |
| -                  | 3214                      | $\nu$ CH (98)                      | -                  | 1307                      | $\beta$ HCC (10)                   |
| -                  | 3183                      | $\nu$ CH (98)                      | -                  | 1042                      | $\delta$ HCCC (12)                 |
| -                  | 3164                      | $\nu$ CH (92)                      | -                  | 1012                      | $\delta$ HCNC (14)                 |
| -                  | 3147                      | $\nu$ CH (82)                      | -                  | 1409                      | $\delta$ HCCC (11)                 |
| -                  | 3138                      | $\nu$ NH (82)                      | -                  | 916                       | $\nu$ NC (10)                      |
| 3175 m             | 3121                      | $\nu$ CH (81)                      | 905 m              | 907                       | $\delta$ HNCC (13)                 |
| 3175 m             | 3109                      | $\nu$ CH (83)                      | 1030 m             | 1032                      | $\nu$ NC (12)                      |
| 3175 m             | 3098                      | $\nu$ CH (97)                      | 780 F              | 727                       | $\delta$ OOON (95)                 |
| 3175 m             | 3147                      | $\nu$ CH (10)                      | 780 F              | 723                       | $\delta$ OOON (98)                 |
| 3175 m             | 3109                      | $\nu$ CH (10)                      | 780 F              | 719                       | $\delta$ OOON (97)                 |
| 3000 F, L          | 2884                      | $\nu$ NH (89)                      | 780 F              | 713                       | $\delta$ OOON (96)                 |
| 3000 F, L          | 2857                      | $\nu$ NH (92)                      | -                  | 706                       | $\delta$ CCNC (21)                 |
| 2680 m             | 2619                      | $\nu$ NH (90)                      | -                  | 706                       | $\delta$ HNCC (32)                 |
| 2680 m             | 2605                      | $\nu$ NH (89)                      | -                  | 665                       | $\delta$ CCNC (53)                 |
| 1756 f             | 1777                      | $\beta$ HNH (64)                   | -                  | 664                       | $\beta$ ONO (61)                   |
| 1756 f             | 1771                      | $\beta$ HNH (53)                   | -                  | 651                       | $\nu$ CC (10)                      |
| 1756 f             | 1738                      | $\beta$ HNH (66)                   | -                  | 654                       | $\beta$ ONO 60)                    |
| 1756 f             | 1707                      | $\beta$ HNH (44)                   | -                  | 656                       | $\beta$ ONO (19)                   |
| 1756 f             | 1693                      | $\beta$ HNH (63)                   | -                  | 656                       | $\beta$ ONO (10)                   |
| -                  | 1777                      | $\delta$ HNHO (10)                 | -                  | 656                       | $\delta$ CNCN (19)                 |
| -                  | 1663                      | $\nu$ CC (49)                      | -                  | 928                       | $\delta$ CNCN (10)                 |
| -                  | 1653                      | $\nu$ CC (48)                      | 1164 M             | 1189                      | $\beta$ ONO (10)                   |
| -                  | 1663                      | $\beta$ HNC (12)                   | 696 F              | 644                       | $\beta$ ONO (13)                   |
| 1591 F             | 1551                      | $\nu$ NC (57)                      | 696 F              | 640                       | $\beta$ ONO (71)                   |
| 1591 F             | 1538                      | $\nu$ NC (57)                      | 696 F              | 639                       | $\beta$ ONO (65)                   |
| -                  | 1530                      | $\beta$ HCH (69)                   | -                  | 624                       | $\nu$ CC (22)                      |
| -                  | 1526                      | $\beta$ HCH (77)                   | 596 f              | 543                       | $\beta$ NHO (47)                   |
| -                  | 1513                      | $\beta$ HCH (71)                   | 596 f              | 538                       | $\beta$ NHO (16)                   |
| -                  | 1508                      | $\beta$ HCH (81)                   | -                  | 493                       | $\beta$ CCN (45)                   |

|           |      |                    |        |      |                    |
|-----------|------|--------------------|--------|------|--------------------|
| -         | 1653 | $\beta$ HNC (16)   | -      | 475  | $\beta$ CCN (14)   |
| 1464 F    | 1464 | $\beta$ HNC (55)   | -      | 380  | $\beta$ CCC (52)   |
| 1464 F    | 1663 | $\beta$ HNC (11)   | -      | 475  | $\beta$ CCC (18)   |
| -         | 1530 | $\delta$ HCCC (23) | -      | 315  | $\beta$ CCC (17)   |
| -         | 1526 | $\delta$ HCCC (16) | -      | 304  | $\nu$ OH (44)      |
| -         | 1513 | $\delta$ HCCN 10)  | -      | 282  | $\nu$ OH (42)      |
| -         | 1418 | $\delta$ HCCN (27) | -      | 272  | $\delta$ CCCN (49) |
| 1380 F, L | 1411 | $\nu$ ON (43)      | -      | 315  | $\nu$ OH (23)      |
| 970 m     | 928  | $\delta$ HCCC (15) | -      | 218  | $\nu$ OH (59)      |
| -         | 1402 | $\nu$ ON (56)      | -      | 202  | $\beta$ CCC (29)   |
| -         | 1441 | $\beta$ HCN (12)   | -      | 65   | $\delta$ HNCC (14) |
| -         | 1362 | $\beta$ CCN (11)   | -      | 171  | $\nu$ OH           |
| -         | 1346 | $\beta$ HCN (15)   | -      | 543  | $\delta$ NHON (11) |
| 1380 F, L | 1346 | $\nu$ ON (16)      | -      | 282  | $\delta$ NHON (10) |
| 1380 F, L | 1346 | $\nu$ ON (18)      | -      | 155  | $\delta$ CNHO (10) |
| -         | 1318 | $\beta$ HCC (45)   | -      | 155  | $\delta$ HOHN (10) |
| 1306 m    | 1307 | HCCN (20)          | -      | 143  | $\beta$ NHO (15)   |
| -         | 1460 | $\nu$ NC (10)      | -      | 1693 | $\delta$ HNHO (16) |
| -         | 1259 | $\beta$ CCN (11)   | -      | 133  | $\delta$ HOHN (11) |
| -         | 1259 | $\nu$ ON (20)      | -      | 121  | $\beta$ HON (39)   |
| -         | 678  | $\delta$ CCNC (19) | -      | 114  | $\delta$ HNHO (31) |
| 1247 m    | 1238 | $\nu$ ON (64)      | -      | 110  | $\gamma$ CCCC (11) |
| 1247 m    | 1222 | $\nu$ ON (54)      | -      | 104  | $\delta$ CCCN (24) |
| -         | 1496 | $\nu$ NC (14)      | 1756 f | 1777 | $\beta$ HNC (10)   |
| -         | 1679 | $\delta$ CNHO (15) | -      | 102  | $\beta$ HON (12)   |
| -         | 1418 | $\beta$ HCC (13)   | -      | 39   | $\delta$ CCCN (11) |
| -         | 1738 | $\delta$ HNHO (13) | -      | 81   | $\delta$ CHON (20) |
| 1164 m    | 1189 | $\nu$ ON (54)      | -      | 1149 | $\beta$ NHO (13)   |
| -         | 1418 | $\beta$ HCC (10)   | -      | 195  | $\delta$ CCCN (11) |
| -         | 1551 | $\beta$ HCN (20)   | -      | 73   | $\delta$ HONO (11) |
| -         | 1149 | $\delta$ HNCN (44) | -      | 165  | $\delta$ HNHO (33) |
| 1105 F    | 1297 | $\nu$ NC (12)      | -      | 79   | $\delta$ HONO (16) |
| 1105 F    | 1111 | $\nu$ NC (43)      | -      | 141  | $\beta$ HON (12)   |
| 1105 F    | 1088 | $\nu$ NC (68)      | -      | 45   | $\delta$ HNHO (11) |
| 1080 m    | 1065 | $\nu$ CC (76)      | -      | 59   | $\delta$ HONO (11) |
| -         | 1318 | $\delta$ HCCN (11) | -      | 45   | $\delta$ HNCN (10) |
| -         | 1538 | $\beta$ HCN (21)   | -      | 202  | $\delta$ HNCC (16) |
| -         | 1012 | $\delta$ HNCN (37) | -      | 34   | $\beta$ HOH (13)   |
| -         | 1006 | $\beta$ NCN (54)   | -      | 155  | $\delta$ HONO (17) |
| -         | 987  | $\beta$ CNC (34)   | -      | 45   | $\beta$ HON (19)   |

Abbreviations:  $\nu$ , stretching;  $\beta$ , bending in plane;  $\delta$ , torsion;  $\gamma$ , bending out of the plane, PED, potential energy distribution data.

---

**Table S2.** Parameters of the HOMO-LUMO boundary molecular orbitals of HTN

|                                                    |           |
|----------------------------------------------------|-----------|
| $E_{\text{HOMO}}$ (eV)                             | -6.453472 |
| $E_{\text{LUMO}}$ (eV)                             | -2.855728 |
| $ E_{\text{HOMO}} - E_{\text{LUMO}} $ Gap (eV)     | 3.59      |
| $E_{\text{HOMO}-1}$ (eV)                           | -7.22704  |
| $E_{\text{LUMO}+1}$ (eV)                           | -2.275552 |
| $ E_{\text{HOMO}-1} - E_{\text{LUMO}+1} $ Gap (eV) | 4.951488  |
| Ionization potential: $I = -E_{\text{HOMO}}$       | 6.453472  |
| Electronic affinity: $A = -E_{\text{LUMO}}$        | 2.855728  |
| Electronegativity : $\chi = (I + A) / 2$           | 4.6546    |
| Chemical potential: $\mu = -(I + A) / 2$           | -4.6546   |
| Hardness : $\eta = (I - A) / 2$                    | 1.798872  |
| Softness : $S = 1 / 2\eta$                         | 0.277952  |
| Global electrophilicity: $\omega = \mu^2 / 2\eta$  | 6.021913  |
